# Supplementary material for: Adolescents’ Aided Recall of Targeted and Non-Targeted Tobacco Communication Campaigns in the United States
Source: PubMed Central journal article supplement (PMC6266583; doi:10.3390/ijerph15112363), 2018-10-25
Supplement: ijerph-15-02363-s001.pdf [file ijerph-15-02363-s001.pdf]

## Supplementary Materials

**Table S1.** Free text responses to the ads among individuals who reported that they feel more positive toward tobacco products after reporting having seen or heard the ad (Exact question wording: “Can you tell me in a few words why you felt more positive?”).

|                                                         |                                                                                                                                                          |
|---------------------------------------------------------|----------------------------------------------------------------------------------------------------------------------------------------------------------|
| <i>The Real Cost—Bully</i>                              | Bad for you                                                                                                                                              |
|                                                         | Encouraged not to smoke                                                                                                                                  |
|                                                         | Gave more info about tobacco                                                                                                                             |
|                                                         | Grandfather smokes & gives hope that he might stop                                                                                                       |
|                                                         | I really don't want to smoke                                                                                                                             |
|                                                         | It looked convincing                                                                                                                                     |
|                                                         | It seemed like that tobacco was it's very bad for teenagers it seemed like, it seemed like they're willing to sell to anybody that will take their money |
|                                                         | Leads to cancer                                                                                                                                          |
|                                                         | Like to see people trying to stop smoking                                                                                                                |
|                                                         | More positive because they were putting out more anti-smoking ads to educate the public about the harms of smoking                                       |
|                                                         | Tobacco is bad for you and your lungs                                                                                                                    |
| <i>The Real Cost—Science Class</i>                      | Bad for you                                                                                                                                              |
|                                                         | Because she would never smoke                                                                                                                            |
|                                                         | Don't know                                                                                                                                               |
|                                                         | It did creep her out                                                                                                                                     |
|                                                         | Leave it alone                                                                                                                                           |
|                                                         | More against it                                                                                                                                          |
|                                                         | Showed what it can do to you                                                                                                                             |
|                                                         | Shows you to not smoke                                                                                                                                   |
|                                                         | Tobacco is like a bug and it controls you                                                                                                                |
|                                                         | Trying to reach out to kids that do smoke                                                                                                                |
| Visual of what it could do to you                       |                                                                                                                                                          |
| <i>The Real Cost—Face of Dip</i>                        | Ad showed what it could do to your mouth                                                                                                                 |
|                                                         | Because cigarettes make you sick                                                                                                                         |
|                                                         | Because it was scary                                                                                                                                     |
|                                                         | He doesn't know                                                                                                                                          |
|                                                         | Medical reasons, harmful                                                                                                                                 |
|                                                         | Mess your teeth up                                                                                                                                       |
| <i>Tips from Former Smokers—Serious Health Problems</i> | Nobody in family daps                                                                                                                                    |
|                                                         | After seeing that ad, it made me think more of why you should not smoke                                                                                  |
|                                                         | Because it shows the terrible things that could happen if you smoke, this discourages ppl from wanting to smoke                                          |
|                                                         | Cigarettes hurt your body                                                                                                                                |
|                                                         | I don't know                                                                                                                                             |
|                                                         | Make your lungs bad                                                                                                                                      |
|                                                         | Makes you not want to do those negative things                                                                                                           |
|                                                         | Not really                                                                                                                                               |
|                                                         | Safety and harmful                                                                                                                                       |
|                                                         | Stop more people from smoking                                                                                                                            |
| Testimony to the truth about smoking                    |                                                                                                                                                          |
| <i>Fresh Empire—Keeping It Fresh</i>                    | Because she showed how much she cared about her family and how much she wanted to protect them from tobacco.                                             |
|                                                         | Because they rejected it                                                                                                                                 |
|                                                         | Because they were showing that it is possible to give up smoking                                                                                         |
|                                                         | He did the right thing to not harm him or his family                                                                                                     |
|                                                         | I agree that smoking causes problems, grandma died from it.                                                                                              |
|                                                         | I just felt more positive; its hard to describe                                                                                                          |
|                                                         | It was showing people not to smoke                                                                                                                       |
|                                                         | Not to smoke because it's bad for you                                                                                                                    |
|                                                         | Positive that they were saying no                                                                                                                        |
|                                                         | Positive is good, I don't know                                                                                                                           |
| Smoking will kill you                                   |                                                                                                                                                          |

**Table S2.** Descriptive statistics for attitudes toward tobacco products after seeing the ad among adolescents who recalled seeing the ad.

| Variable                                                                                                                                                                                                            | Unweighted n | Weighted % |
|---------------------------------------------------------------------------------------------------------------------------------------------------------------------------------------------------------------------|--------------|------------|
| <i>The Real Cost</i> —Bully                                                                                                                                                                                         |              |            |
| More negative                                                                                                                                                                                                       | 291          | 58.00      |
| More positive                                                                                                                                                                                                       | 11           | 2.99       |
| No different                                                                                                                                                                                                        | 195          | 39.00      |
| <i>The Real Cost</i> —Science Class                                                                                                                                                                                 |              |            |
| More negative                                                                                                                                                                                                       | 433          | 71.74      |
| More positive                                                                                                                                                                                                       | 11           | 1.61       |
| No different                                                                                                                                                                                                        | 160          | 26.65      |
| <i>The Real Cost</i> —Face of Dip                                                                                                                                                                                   |              |            |
| More negative                                                                                                                                                                                                       | 419          | 79.49      |
| More positive                                                                                                                                                                                                       | 7            | 1.63       |
| No different                                                                                                                                                                                                        | 94           | 18.87      |
| <i>Tips from Former Smokers</i> —Serious Health Problems                                                                                                                                                            |              |            |
| More negative                                                                                                                                                                                                       | 655          | 81.57      |
| More positive                                                                                                                                                                                                       | 13           | 1.62       |
| No different                                                                                                                                                                                                        | 134          | 16.82      |
| <i>Fresh Empire</i> —Keeping It Fresh                                                                                                                                                                               |              |            |
| More negative                                                                                                                                                                                                       | 194          | 60.37      |
| More positive                                                                                                                                                                                                       | 12           | 3.49       |
| No different                                                                                                                                                                                                        | 114          | 36.15      |
| Note: Cases where adolescents answered “do not know” or “refuse to answer” were coded as missing and dropped from analyses. In logistic regression models, responses of “more positive” were dropped from analyses. |              |            |

**Table S3.** Combinations of aided recall to ads, n=973.

| Ad Recall Index                                                                            | Unweighted n | Weighted % |
|--------------------------------------------------------------------------------------------|--------------|------------|
| Recalled 0 ads, n=40                                                                       | 40           | 4.71       |
| Recalled 1 ad, n=104                                                                       |              |            |
| 1 <i>The Real Cost</i> ad                                                                  | 34           | 5.00       |
| 1 <i>Fresh Empire</i> ad                                                                   | 8            | 0.65       |
| 1 <i>Tips from Former Smokers</i> ad                                                       | 62           | 5.30       |
| Recalled 2 ads, n=218                                                                      |              |            |
| 2 <i>The Real Cost</i> ads                                                                 | 35           | 4.87       |
| 1 <i>The Real Cost</i> ads, 1 <i>Fresh Empire</i> ad                                       | 11           | 1.48       |
| 1 <i>The Real Cost</i> ad, 1 <i>Tips from Former Smokers</i> ad                            | 142          | 12.25      |
| 1 <i>Fresh Empire</i> ad, 1 <i>Tips from Former Smokers</i> ad                             | 281          | 29.84      |
| Recalled 3 ads, n=317                                                                      |              |            |
| 3 <i>The Real Cost</i> ads                                                                 | 23           | 3.08       |
| 2 <i>The Real Cost</i> ads, 1 <i>Fresh Empire</i> ad                                       | 15           | 1.59       |
| 2 <i>The Real Cost</i> ads, 1 <i>Tips from Former Smokers</i> ad                           | 215          | 20.74      |
| 1 <i>The Real Cost</i> ad, 1 <i>Fresh Empire</i> ad, 1 <i>Tips from Former Smokers</i> ad  | 64           | 6.83       |
| Recalled 4 ads, n=217                                                                      |              |            |
| 3 <i>The Real Cost</i> ads, 1 <i>Fresh Empire</i> ad                                       | 6            | 0.59       |
| 3 <i>The Real Cost</i> ads, 1 <i>Tips from Former Smokers</i> ad                           | 101          | 8.88       |
| 2 <i>The Real Cost</i> ads, 1 <i>Fresh Empire</i> ad, 1 <i>Tips from Former Smokers</i> ad | 110          | 10.37      |
| Recalled 5 ads, n=77                                                                       | 77           | 7.82       |
| Note: All categories are mutually exclusive and percentages add to 100%.                   |              |            |

**Table S4.** Weighted logistic regression results for negative feelings toward tobacco products among adolescents who reported having seen or heard each ad, from a national sample of adolescents, conducted by the Carolina Survey Research Laboratory from August 2016 to May 2017 <sup>a,b</sup>

|                           | <i>The Real Cost—<br/>Bully, n=490</i> | <i>The Real Cost—<br/>Science Class,<br/>n=595</i> | <i>The Real Cost—<br/>Face of Dip, n=517</i> | <i>Tips from Former<br/>Smokers—Serious<br/>Health Problems, n=797</i> | <i>Fresh Empire—Keeping It<br/>Fresh, n=319</i> |
|---------------------------|----------------------------------------|----------------------------------------------------|----------------------------------------------|------------------------------------------------------------------------|-------------------------------------------------|
| <b>Variable</b>           | <b>aOR (95% CI)</b>                    | <b>aOR (95% CI)</b>                                | <b>aOR (95% CI)</b>                          | <b>AOR (95% CI)</b>                                                    | <b>AOR (95% CI)</b>                             |
| Ad recall index           | <b>1.35 (1.01, 1.81)</b>               | <b>1.58 (1.19, 2.08)</b>                           | 1.23 (0.91, 1.66)                            | <b>1.39 (1.09, 1.79)</b>                                               | <b>1.52 (1.09, 2.10)</b>                        |
| Sex at birth              |                                        |                                                    |                                              |                                                                        |                                                 |
| Male                      | REF                                    | REF                                                | REF                                          | REF                                                                    | REF                                             |
| Female                    | 0.75 (0.44, 1.26)                      | 1.18 (0.71, 1.96)                                  | 0.73 (0.39, 1.35)                            | 1.34 (0.82, 2.21)                                                      | 1.58 (0.85, 2.92)                               |
| Age                       | 1.09 (0.90, 1.31)                      | 0.98 (0.81, 1.19)                                  | 1.11 (0.90, 1.38)                            | <b>1.32 (1.10, 1.58)</b>                                               | 1.02 (0.79, 1.32)                               |
| Race                      |                                        |                                                    |                                              |                                                                        |                                                 |
| White                     | REF                                    | REF                                                | REF                                          | REF                                                                    | REF                                             |
| Black or African American | 0.64 (0.31, 1.32)                      | 1.15 (0.58, 2.29)                                  | <b>0.46 (0.22, 0.99)</b>                     | 0.73 (0.37, 1.41)                                                      | 1.22 (0.53, 2.81)                               |
| Other                     | 2.22 (0.49, 10.02)                     | 0.52 (0.19, 1.43)                                  | 0.82 (0.26, 2.59)                            | 0.85 (0.30, 2.41)                                                      | 1.30 (0.41, 4.11)                               |
| Ethnicity                 |                                        |                                                    |                                              |                                                                        |                                                 |
| Non-Hispanic              | REF                                    | REF                                                | REF                                          | REF                                                                    | REF                                             |
| Hispanic                  | 1.25 (0.35, 4.44)                      | 0.95 (0.36, 2.49)                                  | <b>5.64 (1.24, 25.63)</b>                    | 0.64 (0.24, 1.72)                                                      | 1.35 (0.40, 4.61)                               |
| Parent Education          |                                        |                                                    |                                              |                                                                        |                                                 |
| Greater than high school  | REF                                    | REF                                                | REF                                          | REF                                                                    | REF                                             |
| High school or less       | 1.45 (0.77, 2.73)                      | 1.02 (0.57, 1.82)                                  | 0.68 (0.35, 1.30)                            | 1.03 (0.56, 1.88)                                                      | 1.08 (0.52, 2.25)                               |
| Cigarette Smoking Status  |                                        |                                                    |                                              |                                                                        |                                                 |
| Not susceptible           | REF                                    | REF                                                | REF                                          | REF                                                                    | REF                                             |
| Susceptible               | 1.46 (0.63, 3.40)                      | 1.01 (0.44, 2.30)                                  | 0.66 (0.27, 1.62)                            | 0.60 (0.28, 1.26)                                                      | 0.36 (0.12, 1.07)                               |
| Current cigarette smoker  | 2.22 (0.32, 15.24)                     | 1.40 (0.35, 5.71)                                  | 4.62 (0.40, 53.71)                           | 0.33 (0.09, 1.24)                                                      | 0.89 (0.09, 8.65)                               |
| Other tobacco product use |                                        |                                                    |                                              |                                                                        |                                                 |
| No                        | REF                                    | REF                                                | REF                                          | REF                                                                    | REF                                             |
| Yes                       | <b>0.37 (0.15, 0.92)</b>               | <b>0.38 (0.14, 0.98)</b>                           | 0.58 (0.20, 1.64)                            | 0.97 (0.39, 2.40)                                                      | 2.45 (0.75, 7.97)                               |
| Region                    |                                        |                                                    |                                              |                                                                        |                                                 |
| Northeast                 | REF                                    | REF                                                | REF                                          | REF                                                                    | REF                                             |
| Midwest                   | 0.73 (0.31, 1.74)                      | 0.65 (0.29, 1.46)                                  | 0.40 (0.14, 1.17)                            | 0.67 (0.28, 1.58)                                                      | 0.87 (0.32, 2.36)                               |
| South                     | 1.16 (0.51, 2.62)                      | 0.76 (0.36, 1.60)                                  | 0.47 (0.17, 1.32)                            | 0.69 (0.31, 1.54)                                                      | 0.94 (0.39, 2.26)                               |
| West                      | 1.04 (0.39, 2.73)                      | 0.89 (0.34, 2.30)                                  | 0.48 (0.12, 2.01)                            | 0.66 (0.25, 1.78)                                                      | 2.52 (0.81, 7.85)                               |

<sup>a</sup> Boldface indicates significance  $p < 0.05$ ; <sup>b</sup> “More negative” responses are compared to “more positive” and “no difference” responses. Red indicates that the results presented here either became significant or non-significant, compared to results in Table 3.
